# Supplementary material for: Carbon source-dependent alteration of Puf3p activity mediates rapid changes in the stabilities of mRNAs involved in mitochondrial function
Source: PubMed Central journal article supplement — Nucleic Acids Res. 2013 Dec 25;42(6):3954–70. doi: 10.1093/nar/gkt1346 (PMC3973295; doi:10.1093/nar/gkt1346), 2013-12-25
Supplement: supp_gkt1346_nar-00689-y-2013-File011.pdf [file supp_gkt1346_nar-00689-y-2013-File011.pdf]

**TABLE S1.** Oligonucleotides Used in This Study

| Oligo  | Description                     | Sequence                                                      |
|--------|---------------------------------|---------------------------------------------------------------|
| oWO2   | <i>COX17</i> Probe              | GGTTGTCGGCAGACTGTCAG                                          |
| oWO21  | <i>scRI</i> Probe               | GTCTAGCCGCGAGGAAGG                                            |
| oWO124 | <i>PUF3</i> Probe               | CTTACCCTCACCTCAGAGACATTAAC                                    |
| oWO292 | <i>MAS6</i> Probe               | CTTGACACTACACCAGACGGCGCAC                                     |
| oWO293 | <i>MRP21</i> Probe              | CAATCAACCTCTTGAAGCCCATCATG                                    |
| oWO294 | <i>RSM10</i> Probe              | GGGCTATCCAATAGTTCCAATAC                                       |
| oWO296 | <i>MRP1</i> Probe               | GGATCTTAGTACGTTGAGGTAACC                                      |
| oWO297 | <i>RSM19</i> Probe              | GAAACGCTTCTGGTAGGTGCGAAC                                      |
| oWO298 | <i>PET123</i> Probe             | GCGTCTAAGGCACTTTCGAATACATG                                    |
| oWO299 | <i>CYT2</i> Probe               | GTATGTGGAACTAGGGAGGGTATG                                      |
| oWO300 | <i>MRPL6</i> Probe              | CATCGTTAACGTATATTCCTTTGCC                                     |
| oWO301 | <i>TUF1</i> Probe               | CGTGTGATTAGACCGGTACCAACAGTTC                                  |
| oWO315 | <i>MFA2</i> Probe               | CCTAGATCTCTTGGTTGTCGTC                                        |
| oWO380 | <i>ATP11</i> Probe              | CGAAATCAATTTCTCGACGGTGAATCC                                   |
| oWO381 | <i>MRPL39</i> Probe             | GCGTATTGATGGGCTTACATGCCG                                      |
| oWO394 | <i>CYT2</i> 3' UTR up Primer    | CTAGATCTGAATTACTACAACCTATTCCCTG                               |
| oWO395 | <i>CYT2</i> 3' UTR down Primer  | CTAAGCTTGAGAATGGACAGATATTGTAGAG                               |
| oWO415 | <i>CYT2</i> SDM Primer 1        | CCAAGAGATCTGAATTACTACAACCTATTCCA<br>CACAATAAAAACATACCCTCCCTAG |
| oWO416 | <i>CYT2</i> SDM Primer 2        | CTAGGGAGGGTATGTTTTTTATTGTGTGGAATA<br>GTTGTAGTAATTCAGATCTCTTGG |
| oWO432 | <i>MFA2</i> Cutter              | CGATAACACAGGCGGGATCC                                          |
| oWO433 | <i>MFA2-CYT2</i> Junction Probe | GTAATTCACATCTCTTGGTTGTCGTC                                    |
| oWO523 | <i>STE3</i> Probe               | GTTTACACACAATTCGTCATT                                         |
| oWO630 | <i>COX17</i> qPCR up Primer     | AGTGCGAGGACAAACCTAAGCC                                        |
| oWO651 | <i>COX17</i> qPCR down Primer   | AGATGCATGTATCCCGCTCCTC                                        |
| oWO796 | <i>STE3</i> qPCR up Primer      | AACACATGCTGCTCTCATCCAC                                        |
| oWO797 | <i>STE3</i> qPCR down Primer    | TTCTCACCGCCGAGTAATAGC                                         |
| oWO790 | <i>CBS1</i> qPCR up Primer      | CGAGCTCGAGTAGTGAACATGGAC                                      |
| oWO791 | <i>CBS1</i> qPCR down Primer    | CGGCAAATTGGCAGGTATTCCG                                        |

SDM=site-directed mutagenesis
